# Supplementary material for: Diameter-selective extraction of single-walled carbon nanotubes by interlocking with Cu-tethered square nanobrackets
Source: publisher site journal article supplement (doi:10.3762/bjoc.20.113), 2024-06-05
Supplement: Additional file 1 [file 1860-5397-20-113-S1.pdf]

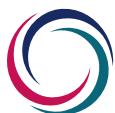

## Supporting Information

for

### **Diameter-selective extraction of single-walled carbon nanotubes by interlocking with Cu-tethered square nanobricks**

Guoqing Cheng and Naoki Komatsu

*Beilstein J. Org. Chem.* **2024**, *20*, 1298–1307. doi:10.3762/bjoc.20.113

**Details of theoretical calculations, experimental procedures,  
copies of  $^1\text{H}$  and  $^{13}\text{C}$  NMR spectra**

## Calculation of the pre-resonance Raman spectra

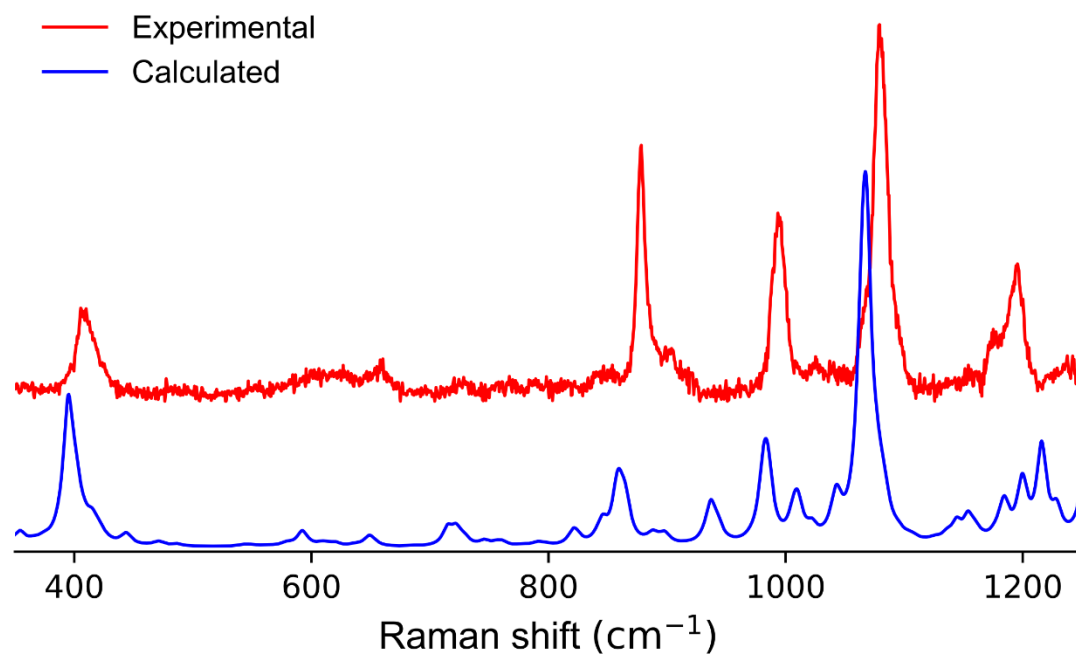

**Figure S1:** Experimental and calculated Raman spectra of Cu-nanobricks **1a** ( $\lambda_{\text{ex}} = 488 \text{ nm}$ ,  $298.15 \text{ K}$ ,  $\text{FWHM} = 10 \text{ cm}^{-1}$ ).

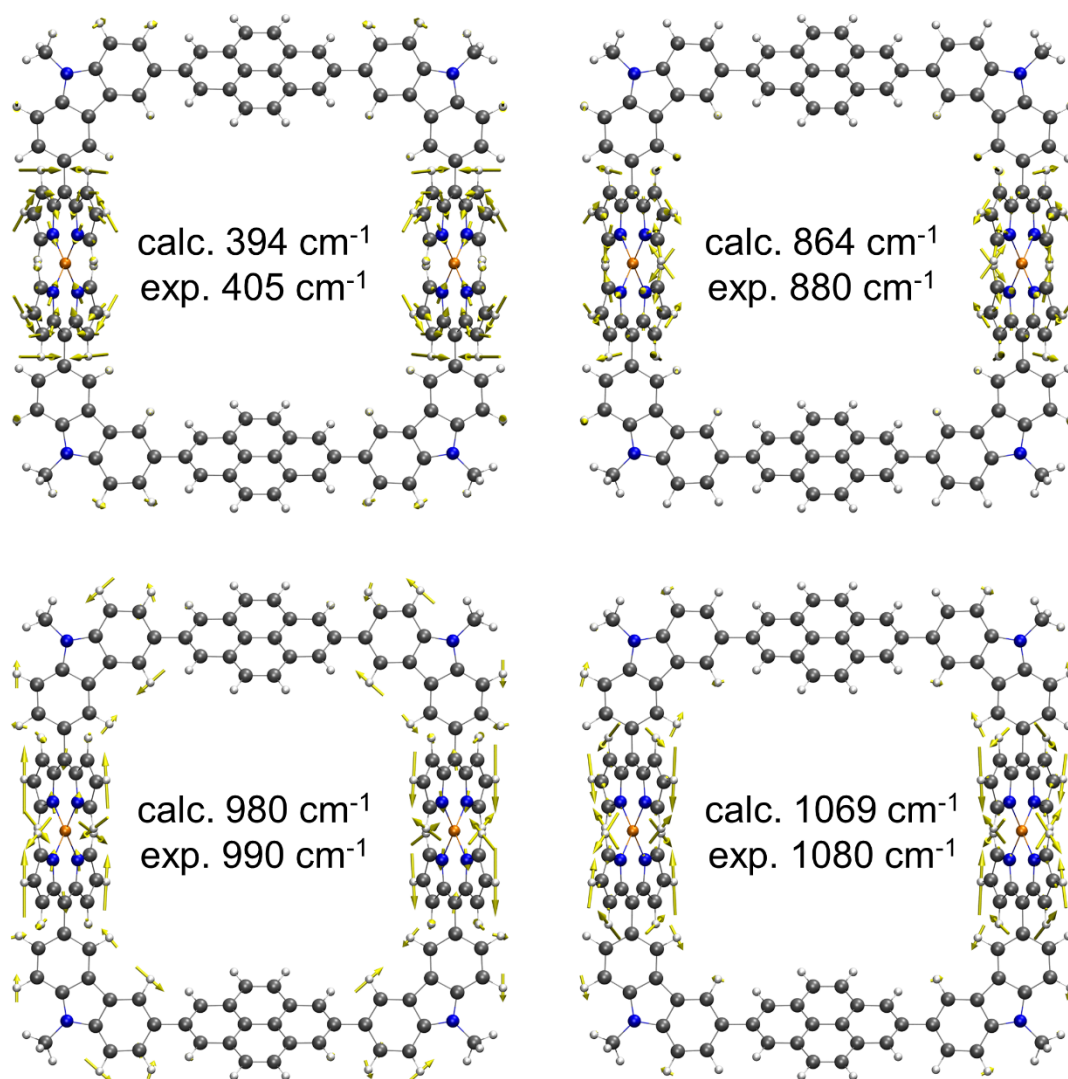

**Figure S2:** Selected vibration modes of Cu-nanobridges **1b** with relatively large Raman activities are indicated by the displacement vectors as yellow-colored arrows. The calculated frequencies are corrected with the scale factor (0.952).

## **Calculation of the binding energies between Cu-nanobricks and SWNTs**

For the calculation of the binding energy between Cu-nanobricks and SWNTs, totally 45 kinds of SWNTs covering the main components in HiPco SWNTs with more than 3 nm length are generated by VMD and the terminals of these SWNTs are capped by hydrogen atoms. Geometry optimizations of three different conformations of each Cu-nanobricks@(*n,m*)-SWNT complex generated by Molclus software are carried out with GFN2-xTB method by using xtb software with the default convergence level. Among these conformations, the one with the lowest energy is used for further analysis. The results were summarized in Table S1.

**Table S1:**  $E_{\text{bind}}$  of Cu-nanobridges **1a** and **1b** with  $(n,m)$ -SWNTs.

| $n$ | $m$ | $E_{\text{bind}}$ (kcal/mol) |           | SWNT<br>Diameter (Å) |  | $n$ | $m$ | $E_{\text{bind}}$ (kcal/mol) |           | SWNT<br>Diameter (Å) |
|-----|-----|------------------------------|-----------|----------------------|--|-----|-----|------------------------------|-----------|----------------------|
|     |     | <b>1a</b>                    | <b>1b</b> |                      |  |     |     | <b>1a</b>                    | <b>1b</b> |                      |
| 10  | 0   | -89.01                       | -94.72    | 7.94                 |  | 6   | 4   | -82.89                       | -86.75    | 6.92                 |
| 11  | 0   | -91.33                       | -108.28   | 8.73                 |  | 7   | 4   | -86.19                       | -91.19    | 7.66                 |
| 12  | 0   | -92.93                       | -117.18   | 9.53                 |  | 8   | 4   | -88.99                       | -102.73   | 8.40                 |
| 13  | 0   | -89.25                       | -121.00   | 10.32                |  | 9   | 4   | -93.35                       | -114.73   | 9.16                 |
| 14  | 0   | -74.02                       | -119.68   | 11.11                |  | 10  | 4   | -90.60                       | -120.25   | 9.92                 |
| 9   | 1   | -87.87                       | -90.99    | 7.57                 |  | 11  | 4   | -83.84                       | -121.00   | 10.68                |
| 10  | 1   | -90.73                       | -102.69   | 8.36                 |  | 6   | 5   | -85.98                       | -89.93    | 7.57                 |
| 11  | 1   | -93.21                       | -113.80   | 9.16                 |  | 7   | 5   | -90.55                       | -101.51   | 8.29                 |
| 12  | 1   | -92.97                       | -119.98   | 9.95                 |  | 8   | 5   | -91.90                       | -111.29   | 9.02                 |
| 13  | 1   | -82.71                       | -121.09   | 10.74                |  | 9   | 5   | -93.04                       | -119.95   | 9.76                 |
| 14  | 1   | -57.53                       | -115.31   | 11.53                |  | 10  | 5   | -86.21                       | -120.91   | 10.50                |
| 8   | 2   | -84.38                       | -86.55    | 7.28                 |  | 11  | 5   | -66.86                       | -118.06   | 11.26                |
| 9   | 2   | -89.92                       | -97.51    | 8.06                 |  | 6   | 6   | -89.07                       | -99.05    | 8.25                 |
| 10  | 2   | -92.55                       | -109.94   | 8.84                 |  | 7   | 6   | -91.73                       | -110.60   | 8.95                 |
| 11  | 2   | -89.68                       | -117.70   | 9.63                 |  | 8   | 6   | -89.49                       | -118.09   | 9.66                 |
| 12  | 2   | -87.56                       | -121.39   | 10.41                |  | 9   | 6   | -87.18                       | -121.08   | 10.38                |
| 13  | 2   | -70.60                       | -119.37   | 11.20                |  | 10  | 6   | -71.76                       | -120.28   | 11.11                |
| 7   | 3   | -79.22                       | -84.68    | 7.06                 |  | 7   | 7   | -89.28                       | -116.58   | 9.63                 |
| 8   | 3   | -88.66                       | -94.36    | 7.82                 |  | 8   | 7   | -87.73                       | -120.49   | 10.32                |
| 9   | 3   | -91.28                       | -104.91   | 8.59                 |  | 9   | 7   | -74.69                       | -120.31   | 11.03                |
| 10  | 3   | -92.81                       | -116.29   | 9.36                 |  | 8   | 8   | -73.61                       | -119.38   | 11.00                |
| 11  | 3   | -91.05                       | -121.00   | 10.14                |  | 9   | 8   | -45.30                       | -113.39   | 11.70                |
| 12  | 3   | -77.41                       | -120.40   | 10.91                |  |     |     |                              |           |                      |

## Synthesis and characterization

### Synthesis of 6,6'-(pyrene-2,7-diyl)bis(9-octyl-9H-carbazole-3-carbaldehyde)

(3b)

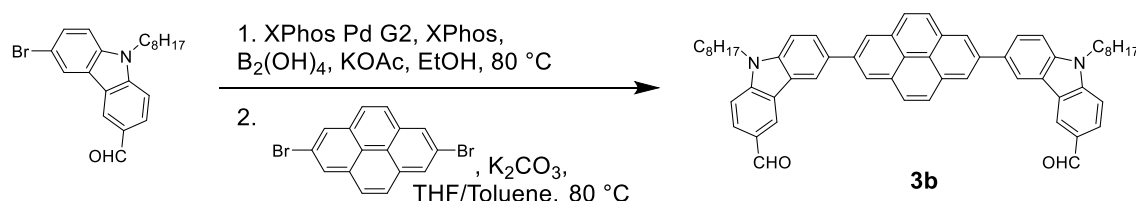

XPhos Pd G2 (19.7 mg, 0.025 mmol), XPhos (23.5 mg, 0.050 mmol), tetrahydroxydiboron (449 mg, 5.0 mmol), potassium acetate (494 mg, 5.0 mmol) and 3-bromo-*N*-octyl-6-formylcarbazole [1] (538 mg, 1.4 mmol) were dissolved in EtOH (15 mL). The flask was then purged by Ar, after O<sub>2</sub> was removed under the vacuum. After stirring at 80 °C for 3 h, aqueous potassium carbonate (1.8 M, 2.5 mL) with the following 2,7-dibromopyrene (180 mg, 0.50 mmol) dispersed in a dry mixture of THF (12 mL) and toluene (4.0 mL) were added into the reaction mixture. The reaction was deoxygenated again, stirred at 80 °C overnight. After cooling to room temperature, H<sub>2</sub>O (20 mL) was added. The aqueous layer was extracted by DCM three times and the combined organic layers were dried over MgSO<sub>4</sub>, concentrated under vacuum, and washed with hexane/DCM (1:1) followed by recrystallization in hexane/DCM to give **3b** as white solid (303 mg, yield: 75 %).

MALDI TOF-MS (matrix: anthracene) of [**3b**]<sup>+</sup>: C<sub>58</sub>H<sub>56</sub>N<sub>2</sub>O<sub>2</sub> Calc. m/z: 812.4342, found m/z: 812.4505. <sup>1</sup>H NMR (400 MHz, CHLOROFORM-*D*) δ 10.15 (s, 2H), 8.77 (d, *J* = 1.6 Hz, 2H), 8.69 (d, *J* = 1.6 Hz, 2H), 8.54 (s, 4H), 8.22 (s, 4H), 8.12 – 8.04 (m, 4H), 7.65 (d, *J* = 8.4 Hz, 2H), 7.54 (d, *J* = 8.5 Hz, 2H), 4.42 (t, *J* = 7.3 Hz, 4H), 2.08 – 1.88 (m, 4H), 1.50 – 1.19 (m, 20H), 0.88 (t, *J* = 6.9 Hz, 6H). <sup>13</sup>C NMR (126 MHz, CHLOROFORM-*D*) δ 191.8, 144.6, 140.8, 139.3, 134.1, 131.6, 128.7, 128.0, 127.0, 124.0, 123.8, 123.6, 123.3, 120.1, 109.9, 109.2, 43.7, 31.8, 29.4, 29.2, 29.0, 27.3, 22.6, 14.1.

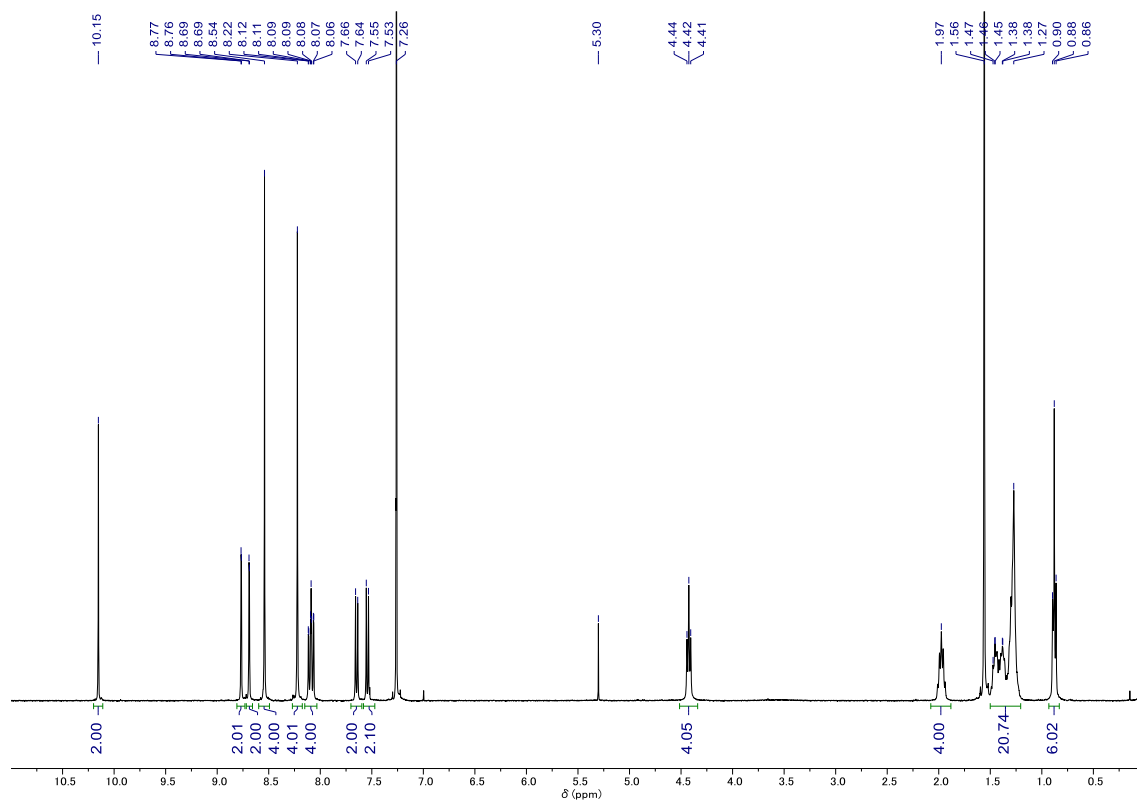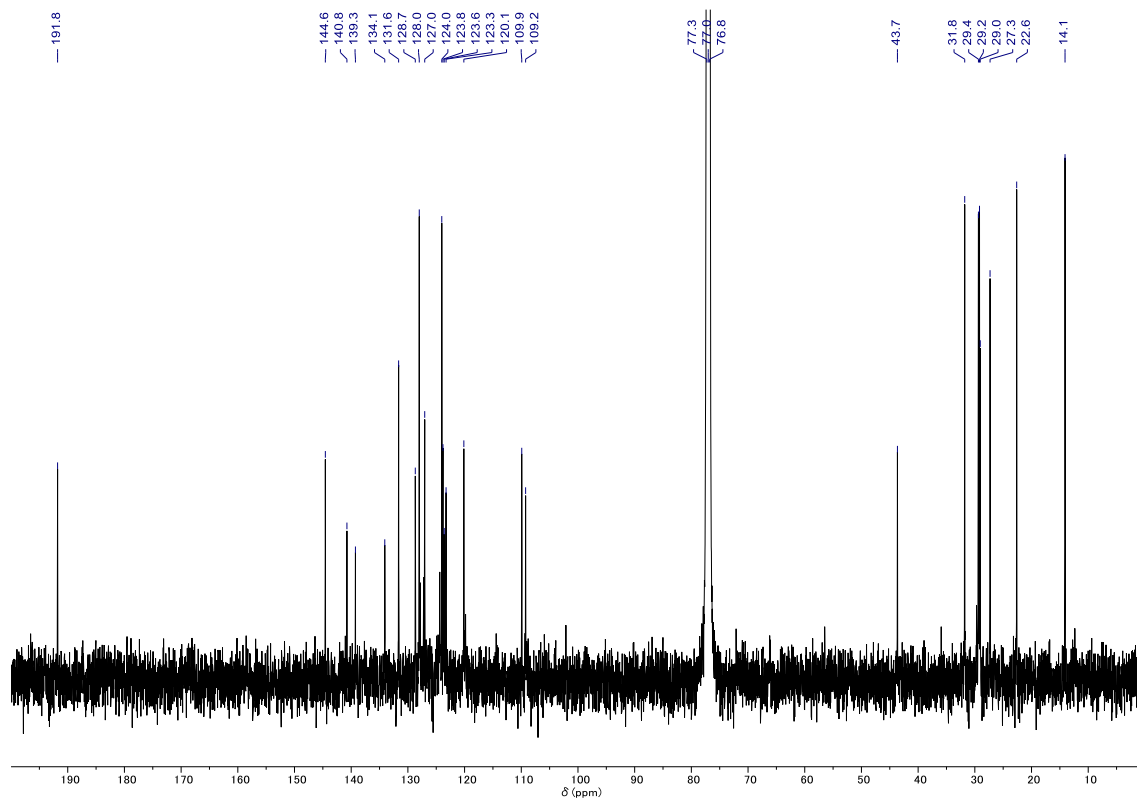

## Synthesis of 4b

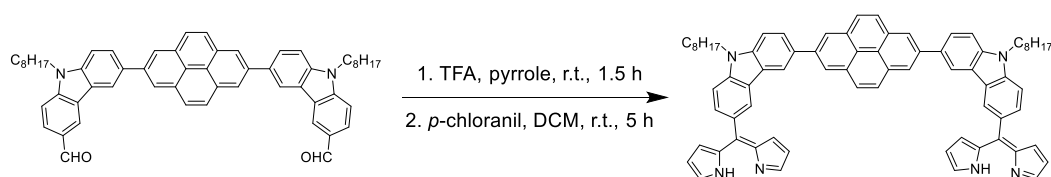

Di-aldehyde **3b** (220 mg, 0.27 mmol) was dissolved in dry pyrrole (20 mL). After trifluoroacetic acid (20  $\mu$ L) was added, the mixture was stirred at room temperature for 1.5 h under Ar. The reaction mixture was then diluted with DCM (20 mL), washed with aqueous NaOH (0.10 M, 20 mL) solution and brine, dried over  $\text{MgSO}_4$ , concentrated under vacuum, and washed with hexane/DCM (1/1). Without further purification, the resulting solid (60 mg, 0.058 mmol) was dissolved in DCM (10 mL) and stirred in an ice bath, after which *p*-chloranil (43 mg, 0.17 mmol) in DCM (10 mL) was added dropwise. By stirring at room temperature for 5 h, the reaction mixture was poured over a silica-gel column and eluted with 3% MeOH/DCM. After recrystallization from DCM/hexane, **4b** was obtained as an orange solid (20 mg, total yield: 7.3%). MALDI TOF-MS (matrix: anthracene) of  $[\mathbf{4b}]^+$ :  $\text{C}_{74}\text{H}_{68}\text{N}_6$  Calc.  $m/z$ : 1040.5505, found  $m/z$ : 1040.5958.  $^1\text{H}$  NMR (400 MHz,  $\text{CHLOROFORM-}D$ )  $\delta$  8.62 (s, 2H), 8.51 (s, 4H), 8.40 (s, 2H), 8.17 (s, 4H), 8.12 – 8.07 (m, 2H), 7.90 (s, 4H), 7.72 – 7.62 (m, 4H), 7.54 (d,  $J$  = 8.5 Hz, 2H), 6.95 – 6.80 (m, 4H), 6.68 – 6.50 (m, 4H), 4.45 (t,  $J$  = 7.1 Hz, 4H), 2.06 – 1.97 (m, 4H), 1.54 – 1.23 (m, 22H), 0.89 (t,  $J$  = 6.7 Hz, 6H).  $^{13}\text{C}$  NMR (126 MHz,  $\text{CHLOROFORM-}D$ )  $\delta$  142.7, 142.6, 142.5, 140.8, 139.3, 133.8, 133.2, 131.6, 128.0, 128.0, 127.0, 124.0, 123.6, 123.4, 120.2, 117.2, 109.9, 43.7, 31.8, 29.4, 29.2, 27.4, 22.7, 14.1.



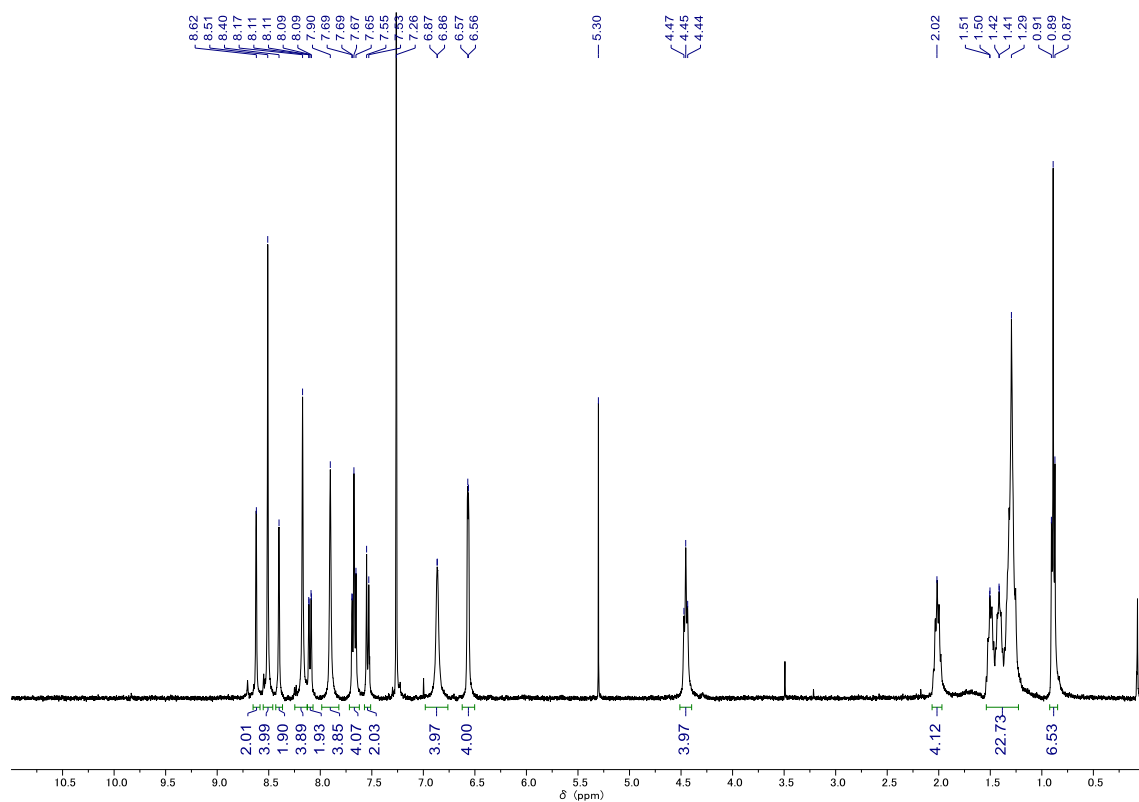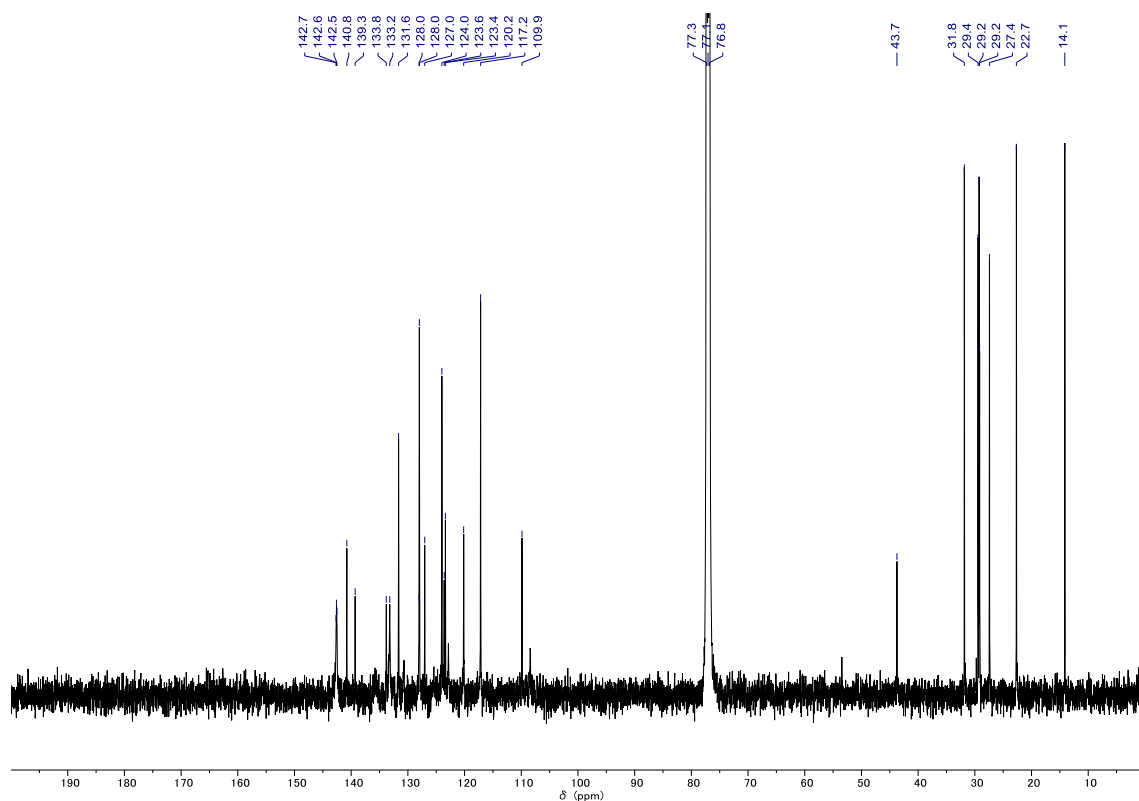

## Synthesis of Cu-nanobridges **1b**

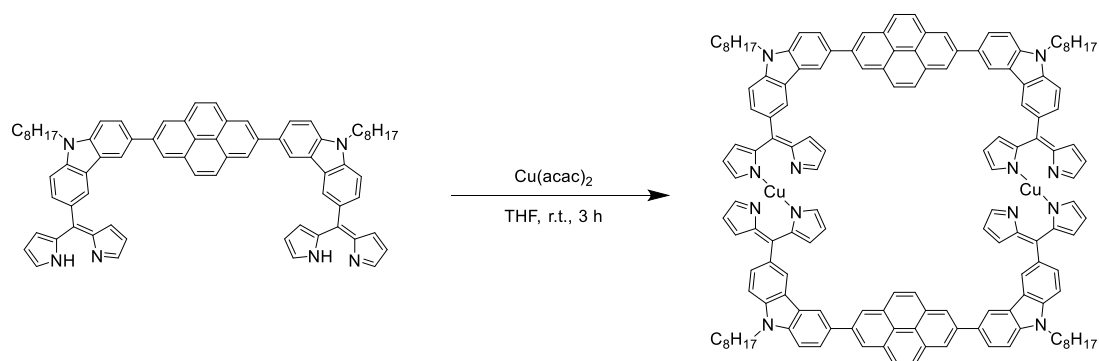

Bis(dipyrrin) **4b** (2.0 mg) and Cu(acac)<sub>2</sub> (copper(II) acetylacetonate, 0.75 mg) were dissolved in THF (5.0 mL) and stirred at rt for 3 h. The reaction mixture was concentrated under vacuum and purified by column chromatography (DCM) to afford Cu-nanobridges **1b** (0.60 mg, 28%). MALDI TOF-MS (matrix: anthracene) of [**1b**]<sup>+</sup>: C<sub>148</sub>H<sub>132</sub>Cu<sub>2</sub>N<sub>12</sub> Calc. *m/z*: 2204.9316, found *m/z*: 2204.9322.

## Reference

1. Chen, H.; Cai, X. R.; Xu, Z. G.; Zhang, T.; Song, B. F.; Li, Y.; Jiang, Q.; Xie, M. G. *Polymer Bulletin* **2008**, 60 (4), 581-590. doi:10.1007/s00289-008-0890-1
